# Supplementary material
Source: HighWire-hosted journal article supplement (https://erj.ersjournals.com/content/54/4/1900897)
Supplement: inline-supplementary-material-1 [file inline-supplementary-material-1.pdf]

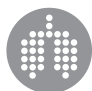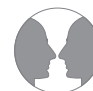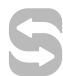

SHAREABLE PDF

# Prevalence of pulmonary hypertension in pulmonary sarcoidosis: the first large European prospective study

Marloes P. Huijtema<sup>1</sup>, Annelies L.M. Bakker<sup>1</sup>, Johannes J. Mager<sup>2</sup>, Benno J.W. M. Rensing<sup>1</sup>, Fokko Smits<sup>3</sup>, Repke J. Snijder<sup>2</sup>, Jan C. Grutters<sup>2,4</sup> and Marco C. Post<sup>1</sup>

**Affiliations:** <sup>1</sup>Dept of Cardiology, St Antonius Hospital, Nieuwegein, The Netherlands. <sup>2</sup>Dept of Pulmonology, St Antonius Hospital, Nieuwegein, The Netherlands. <sup>3</sup>Dept of Radiology, St Antonius Hospital, Nieuwegein, The Netherlands. <sup>4</sup>Dept of Pulmonology, University Medical Centre Utrecht, Utrecht, The Netherlands.

**Correspondence:** Marloes P. Huijtema, Dept of Cardiology, St Antonius Hospital, Koekoekslaan 1, Nieuwegein, 3435 CM, The Netherlands. E-mail: mp.huijtema@antoniusziekenhuis.nl

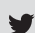

@ERSpublications

**The prevalence of pulmonary hypertension in sarcoidosis seems to differ between ethnicities and was never investigated in a Caucasian cohort. This study shows a prevalence of 3% in a Caucasian cohort, significantly lower compared to other ethnicities.** <http://bit.ly/2kRMrap>

**Cite this article as:** Huijtema MP, Bakker ALM, Mager JJ, *et al.* Prevalence of pulmonary hypertension in pulmonary sarcoidosis: the first large European prospective study. *Eur Respir J* 2019; 54: 1900897 [<https://doi.org/10.1183/13993003.00897-2019>].

This single-page version can be shared freely online.

## To the Editor:

Sarcoidosis is a systemic disease of an unknown aetiology, in which noncaseating granulomas are formed in one or multiple organs, with pulmonary involvement in >90% of the sarcoidosis patients [1]. Pulmonary hypertension (PH), defined as a mean pulmonary artery pressure of  $\geq 25$  mmHg by right heart catheterisation (RHC) [2], is a well recognised complication of sarcoidosis, associated with significant increase in mortality [3, 4]. Although the first case of PH in sarcoidosis was described in 1949 [5], the exact prevalence remains unclear. Only three studies have previously investigated the PH prevalence independently of suggestive symptoms and signs for PH, resulting in prevalence rates of 5.7%, 14% and 20.8% [6–8]. In patients with complaints suggestive of PH or those awaiting lung transplant, rates of PH up to 79% have been reported [9–11]. Unfortunately, most studies are retrospective and have used an echocardiographic definition for PH (increased right ventricular systolic pressure (RVSP) of  $\geq 40$  mmHg), lacking RHC as gold standard.
